# Supplementary material
Source: publisher figshare collection journal article supplement (https://geolsoc.figshare.com/ndownloader/files/15278729)
Supplement: Supplementary file 1 [file 15278729]

## Sheet: Sheet1
Table S3 Lu-Hf isotopic compositions of zircons from the Weiziping migmatites.
Spot No.	Location	Age	1σ	176Hf/177Hf	2σ	176Lu/177Hf	2σ	176Yb/177Hf	2σ	εHf(0)	2σ	εHf(t)	2σ	TDM1 (Ma)	fLu/Hf	TDM2 (Ma)
Sample WZ01
WZ01-04		624.9	10.16	0.282244	1.32e-05	0.000515118	1.26e-05	0.0138446	0.000354	-18.6829	1.12506	-5.12554	1.15322	1404.15	-0.984484	1638.35
WZ01-05		404.6	6.56	0.282366	1.34e-05	0.000147614	1.08e-06	0.0043532	2.84e-05	-14.3649	1.12841	-5.50689	1.14076	1223.98	-0.995554	1480.56
WZ01-07		442.6	9.19	0.282429	2.38e-05	0.000295366	7.11e-07	0.00824321	1.74e-05	-12.1299	1.32576	-2.47689	1.34457	1141.78	-0.991103	1357.18
WZ01-10		405	6.64	0.282321	1.34e-05	0.000270484	8.57e-07	0.00860157	1.22e-05	-15.9599	1.12827	-7.12745	1.14084	1289.77	-0.991853	1563.09
WZ01-11		404.4	6.76	0.282381	1.2e-05	3.64765e-05	3.06e-07	0.00133803	8.02e-06	-13.8203	1.10859	-4.93638	1.1217	1199.46	-0.998901	1451.44
WZ01-16		406.4	7.01	0.282384	1.3e-05	2.91951e-05	3.16e-07	0.000895935	7.15e-06	-13.7142	1.12261	-4.78409	1.13635	1195.14	-0.999121	1445.31
WZ01-21	core	1332.7	19.89	0.281808	1.46e-05	0.00119641	3.25e-06	0.0302581	9.76e-05	-34.1017	1.14508	-5.60458	1.24817	2037.23	-0.963964	2232.55
WZ01-25		407.1	7.41	0.282316	1.49e-05	5.47941e-05	5.38e-07	0.00165467	1.35e-05	-16.119	1.15154	-7.18247	1.16619	1288.73	-0.99835	1567.6
WZ01-27		508.8	10.49	0.282329	2.1e-05	0.000356158	1.15e-06	0.00928833	2.48e-05	-15.6769	1.26491	-4.59613	1.29014	1281.64	-0.989272	1518.12
WZ01-36		403.8	9.5	0.282552	2.1e-05	0.00040751	2.97e-06	0.00977989	6.39e-05	-7.76597	1.26557	1.01072	1.28583	974.557	-0.987726	1148.2
WZ01-37		520	8.37	0.282224	1.64e-05	0.000224387	2.84e-06	0.00588548	7.74e-05	-19.3937	1.17646	-8.02627	1.1953	1421.06	-0.993241	1700.84
WZ01-38		461.7	7.42	0.282288	1.3e-05	0.000233932	7.12e-07	0.00763	2.15e-05	-17.1233	1.12229	-7.03777	1.13794	1333.6	-0.992954	1604.04
WZ01-39		402	6.21	0.282391	1.37e-05	0.000420022	3.15e-06	0.0123076	9.74e-05	-13.4702	1.13299	-4.74121	1.14431	1197.78	-0.987349	1439.55
WZ01-40	core	700.5	11.23	0.282371	1.85e-05	0.000499482	1.09e-05	0.0133983	0.000286	-14.1846	1.21525	1.04051	1.2473	1228.17	-0.984955	1387.05
WZ01-48		486.4	8.84	0.282227	1.66e-05	0.00031112	4.18e-06	0.00834005	0.000119	-19.2841	1.17998	-8.68318	1.19999	1420.01	-0.990629	1707.12
WZ01-58		471	7.45	0.282379	1.61e-05	0.000377004	9.87e-07	0.00900571	2.11e-05	-13.884	1.17176	-3.63553	1.18707	1212.56	-0.988644	1438.94
WZ01-65		419.1	6.59	0.282349	1.46e-05	0.000131706	6.04e-07	0.00346055	1.51e-05	-14.9732	1.14683	-5.7923	1.15926	1247.01	-0.996033	1506.7
WZ01-74	core	966.1	15.45	0.282271	1.47e-05	0.000136293	7.84e-07	0.00403047	1.74e-05	-17.7068	1.14817	3.5824	1.21021	1352.77	-0.995895	1473.99
WZ01-83	core	960	15.29	0.282171	1.77e-05	0.00106079	6.97e-06	0.027048	0.000183	-21.2397	1.19963	-0.686438	1.2582	1525.29	-0.968048	1684.63
WZ01-84		400.1	6.53	0.28222	1.52e-05	0.00011348	5.69e-07	0.00374027	1.68e-05	-19.5387	1.15612	-10.7751	1.16808	1422.58	-0.996582	1743.95
WZ01-90	core	801.5	12.39	0.282411	1.96e-05	0.00129048	1.43e-05	0.0360123	0.000377	-12.7735	1.23674	4.24714	1.27534	1197.76	-0.96113	1306.34
WZ01-95	core	970.6	14.71	0.282385	2e-05	0.000548393	4.3e-06	0.014928	0.000111	-13.6824	1.24465	7.44872	1.2983	1210.1	-0.983482	1281.81
WZ01-98		434.1	6.86	0.282259	1.53e-05	8.71636e-05	5.51e-07	0.00310879	1.36e-05	-18.1489	1.15789	-8.62797	1.17115	1368.09	-0.997375	1662.48
WZ01-110		469.8	7.44	0.282388	1.69e-05	0.000118448	5.53e-06	0.00319786	0.000147	-13.5728	1.1858	-3.26962	1.20091	1192.42	-0.996432	1419.42
WZ01-112		418.3	6.84	0.282428	1.49e-05	0.000104117	6.04e-07	0.00292501	1.39e-05	-12.1617	1.1519	-2.98821	1.16499	1137.37	-0.996864	1363.61
WZ01-113		467.2	7.53	0.282396	1.64e-05	0.000299726	2.79e-06	0.00794587	8.52e-05	-13.3075	1.17701	-3.11766	1.19246	1187.72	-0.990972	1409.58
WZ01-114		401.3	7.95	0.282367	1.35e-05	0.000117497	1.04e-06	0.00329395	2.37e-05	-14.3048	1.12991	-5.51128	1.14651	1220.71	-0.996461	1478.13
WZ01-122		559.9	8.77	0.28227	1.71e-05	0.000320951	3.44e-06	0.00823302	8.66e-05	-17.7351	1.18901	-5.52369	1.2096	1360.34	-0.990333	1606.23
WZ01-127		494.1	8.18	0.282149	1.49e-05	0.000111909	1.51e-06	0.00298563	3.74e-05	-22.0142	1.151	-11.1821	1.16919	1517.8	-0.996629	1839.6
WZ01-128		544.1	8.67	0.282239	1.67e-05	0.000292933	3.64e-06	0.00830535	0.000124	-18.8456	1.18178	-6.97209	1.20191	1402.36	-0.991177	1666.84
Sample WZ02
WZ02-05		403.7	7.96	0.282447	1.74e-05	0.000562957	6.61e-07	0.0147578	1.43e-05	-11.4792	1.19499	-2.74963	1.21087	1124.27	-0.983043	1339.66
WZ02-15		410.5	7.05	0.282462	1.59e-05	0.000382916	3.2e-06	0.0106476	8.91e-05	-10.9664	1.16861	-2.03961	1.18205	1098.99	-0.988466	1309.04
WZ02-16		405.7	6.29	0.282444	1.33e-05	0.000588268	4.37e-06	0.0173009	0.000141	-11.6136	1.12719	-2.84749	1.13882	1130.29	-0.982281	1346.25
WZ02-19		410.8	6.7	0.282438	1.48e-05	0.000397104	5.74e-06	0.0116018	0.000173	-11.801	1.15032	-2.87227	1.16293	1131.98	-0.988039	1351.64
WZ02-30		404.3	7.15	0.282627	1.72e-05	0.000596839	7.28e-06	0.0152203	0.000195	-5.1172	1.19192	3.622	1.20538	875.092	-0.982023	1015.27
WZ02-34		405.5	7.76	0.282559	1.63e-05	0.000894912	1.63e-05	0.0244816	0.000423	-7.53257	1.17579	1.15035	1.19128	977.852	-0.973045	1142.43
WZ02-37		414.7	5.38	0.282522	1.72e-05	0.000646009	7.84e-06	0.0166318	0.000199	-8.8269	1.1916	0.121264	1.20066	1022.43	-0.980542	1202.36
WZ02-40		415.7	5.54	0.282644	1.8e-05	0.00103571	1.53e-06	0.028323	5.67e-05	-4.53015	1.20666	4.33615	1.21599	861.875	-0.968804	988.023
WZ02-45		412.3	19.52	0.282664	1.8e-05	0.00106001	1e-05	0.0280476	0.000228	-3.80872	1.20672	4.97873	1.28465	833.629	-0.968072	952.401
WZ02-47		415.4	5.54	0.282516	1.99e-05	0.000719268	1.53e-05	0.020923	0.000431	-9.05323	1.24303	-0.110286	1.25216	1033.32	-0.978335	1214.72
WZ02-48		407.3	5.76	0.282473	1.53e-05	0.000211897	2.59e-06	0.00632878	6.86e-05	-10.5739	1.15858	-1.67043	1.16864	1078.87	-0.993618	1287.68
WZ02-50	core	672.2	12.22	0.282671	1.42e-05	0.00047767	2.28e-06	0.0125895	5.63e-05	-3.56117	1.14158	11.0696	1.1799	811.188	-0.985612	853.139
Sample WZ03
WZ03-05		405.8	8	0.282801	2.3e-05	0.00084313	1.98e-06	0.0216649	5.82e-05	1.03617	1.30904	9.74715	1.32391	636.123	-0.974605	702.76
WZ03-06		475.9	9.92	0.282312	1.93e-05	0.000464129	6.99e-07	0.0123623	1.65e-05	-16.2675	1.23053	-5.94189	1.25369	1308.26	-0.98602	1559.88
WZ03-10		400	11.01	0.282687	1.84e-05	0.000777028	2.33e-06	0.0197482	5.04e-05	-3.00949	1.21431	5.59038	1.24141	795.716	-0.976596	911.101
WZ03-11		538.1	8.95	0.28266	2.02e-05	0.000829222	3.5e-06	0.0208557	7.88e-05	-3.95372	1.2495	7.61397	1.26963	834.302	-0.975023	920.142
WZ03-25		403.9	7.14	0.28267	2.19e-05	0.00098107	1.76e-05	0.0244607	0.000442	-3.61068	1.28485	5.01823	1.29747	823.991	-0.97045	943.549
WZ03-26		867.9	12.98	0.281959	1.65e-05	0.00143262	2.27e-05	0.0378188	0.000609	-28.7334	1.17738	-10.4014	1.22184	1837.9	-0.956849	2098.98
WZ03-27		628	10.34	0.282413	1.58e-05	0.000514472	1.66e-05	0.0143395	0.000512	-12.7099	1.16675	0.923769	1.19488	1171.01	-0.984504	1334.22
WZ03-31		395.7	6.88	0.282686	2.06e-05	0.00114324	1.35e-05	0.0290537	0.00038	-3.02717	1.25772	5.38369	1.26978	804.187	-0.965565	918.176
WZ03-34		406.5	6.29	0.282274	2e-05	0.000311948	1.4e-06	0.00714801	3.23e-05	-17.6043	1.24432	-8.75167	1.25506	1354.95	-0.990604	1646.6
WZ03-39		658.2	10.66	0.281983	1.64e-05	0.000418153	8.89e-07	0.0105768	2.67e-05	-27.8917	1.17571	-13.5773	1.20538	1757.16	-0.987405	2091.09
WZ03-42		2272.2	31.59	0.281386	1.68e-05	0.000513644	3.64e-06	0.011263	7.61e-05	-48.9971	1.18088	1.10018	1.42895	2571.78	-0.984529	2661.84
WZ03-47		433.6	7.54	0.282816	2.32e-05	0.0013148	3.63e-06	0.0314065	8.89e-05	1.55956	1.31348	10.7351	1.32729	623.041	-0.960398	674.792
WZ03-53		780.2	12.09	0.281986	1.5e-05	0.000165362	1.73e-06	0.00497856	4.75e-05	-27.8033	1.1521	-10.6802	1.1911	1742.34	-0.995019	2043.02
WZ03-56		721.3	11.36	0.282113	1.69e-05	0.000360742	6.33e-06	0.00809662	0.000171	-23.2979	1.18494	-7.56489	1.21857	1577.24	-0.989134	1839.02
WZ03-57	core	1052	16.81	0.281857	1.97e-05	0.000568281	6.43e-06	0.0139901	0.000136	-32.3512	1.23707	-9.48378	1.30527	1936.48	-0.982883	2200.71
WZ03-59		751.2	12.1	0.28194	1.56e-05	9.94487e-05	6.85e-07	0.00281045	1.74e-05	-29.423	1.16187	-12.9116	1.20013	1801.35	-0.997005	2131.92
WZ03-69		398.4	7.05	0.28268	2.17e-05	0.00127134	3.91e-06	0.0317756	9.96e-05	-3.24997	1.28062	5.18451	1.29298	815.893	-0.961707	930.564
WZ03-75		403	6.82	0.28289	2.44e-05	0.00135283	4.76e-06	0.0336497	0.000127	4.16944	1.34061	12.6866	1.352	518.109	-0.959252	549.405
WZ03-76		407.6	7.21	0.282752	2.39e-05	0.000942723	7.57e-06	0.0226012	0.000179	-0.700211	1.32891	8.0211	1.34142	707.138	-0.971605	792.781
WZ03-83	core	994.7	15.45	0.282492	2.18e-05	0.000632983	6.1e-06	0.0161284	0.000161	-9.90904	1.2822	11.7049	1.3392	1064.64	-0.980934	1085.38
WZ03-86		404.5	7.84	0.282828	2.51e-05	0.00125672	1.62e-05	0.0308351	0.000387	1.96978	1.3565	10.5426	1.37049	605.535	-0.962147	660.853
WZ03-89		408.1	7.06	0.282795	2.31e-05	0.00115413	4.16e-06	0.0298733	0.000121	0.823985	1.31122	9.50018	1.32348	649.928	-0.965237	717.32
WZ03-92		438.9	7.82	0.282355	1.64e-05	0.000395603	4.22e-06	0.00772151	9.9e-05	-14.7645	1.17688	-5.22437	1.1929	1247.44	-0.988084	1493.76
WZ03-94		397.8	6.8	0.282723	1.97e-05	0.00130861	4.54e-06	0.032033	0.000126	-1.73638	1.23966	6.67683	1.25167	755.802	-0.960584	853.676
WZ03-95		399.5	7.76	0.282808	2.43e-05	0.00105766	6.58e-06	0.0255491	0.000165	1.28372	1.33811	9.8022	1.35196	629.833	-0.968143	694.783
Sample WZ04
WZ04-02		393.6	6.38	0.282757	2.26e-05	0.00121865	3.85e-06	0.0296973	8.54e-05	-0.52339	1.30017	7.82512	1.31065	705.243	-0.963294	791.403
WZ04-03		402.7	6.49	0.282765	2.19e-05	0.00116312	1.61e-06	0.0287483	4.75e-05	-0.261695	1.28512	8.2958	1.29606	693.692	-0.964966	774.696
WZ04-05		392.1	8.09	0.282531	1.86e-05	0.000486285	6.6e-07	0.01179	1.13e-05	-8.53338	1.21764	-0.0332823	1.23356	1006.66	-0.985353	1191.97
WZ04-11		541.2	8.41	0.282201	1.87e-05	0.000839862	7.63e-06	0.0221149	0.000193	-20.1753	1.21855	-8.56371	1.23724	1474.7	-0.974703	1744.89
WZ04-21	core	717.2	11.8	0.282448	1.68e-05	0.000421088	1.5e-06	0.0105963	3.46e-05	-11.4686	1.1842	4.1642	1.21993	1119.7	-0.987317	1241.97
WZ04-26		401.2	7.59	0.282494	1.92e-05	0.000508034	1.5e-06	0.0130424	3.46e-05	-9.83831	1.22912	-1.14697	1.24347	1058.39	-0.984698	1256.07
WZ04-30		403.2	6.98	0.282808	2.94e-05	0.000812852	1.77e-06	0.0202971	3.88e-05	1.27665	1.46049	9.93986	1.47153	626.037	-0.975517	690.739
WZ04-31		491.2	9.8	0.282521	2.03e-05	0.000795652	1.31e-05	0.0201465	0.000343	-8.87995	1.25111	1.6794	1.2737	1028.56	-0.976035	1184.9
WZ04-36		399.6	6.82	0.282553	1.78e-05	0.000637837	2.93e-06	0.0162929	7.87e-05	-7.73061	1.20266	0.89336	1.21504	979.055	-0.980788	1150.78
WZ04-1N	core	802.5	15.39	0.282491	1.82e-05	0.000801638	7.17e-06	0.0206538	0.000211	-9.92673	1.20994	7.38187	1.26578	1070.07	-0.975854	1147.86
WZ04-2N		543.5	7	0.282286	2.19e-05	0.000337055	3.62e-06	0.00907996	0.000119	-17.1728	1.28374	-5.32647	1.29758	1339.09	-0.989848	1583.05
WZ04-5N	core	796.4	14.11	0.282445	2e-05	0.000567812	4.56e-06	0.0148521	0.00013	-11.5747	1.24483	5.72231	1.29191	1128.16	-0.982897	1227.27
WZ04-15N		386.4	5.12	0.282567	2.13e-05	0.000450128	1.83e-06	0.0113534	4.91e-05	-7.24258	1.27187	1.14376	1.27969	955.127	-0.986442	1127.32
WZ04-16N	core	635.1	10.61	0.282366	1.93e-05	0.000467057	1.8e-06	0.0116575	4.76e-05	-14.3685	1.23069	-0.561837	1.25875	1234.31	-0.985932	1415.39
WZ04-20N	core	836.1	13.86	0.282374	2.5e-05	0.000615577	9.48e-06	0.0151264	0.000236	-14.0679	1.35294	4.06849	1.39615	1227.33	-0.981459	1343.57
WZ04-25N		398.6	5.22	0.282655	2.1e-05	0.000960075	3.88e-06	0.023813	8.48e-05	-4.13407	1.26587	4.38618	1.27404	844.378	-0.971082	971.568
WZ04-26N		394.7	5.18	0.282445	2e-05	0.000526801	1.9e-06	0.013487	4.21e-05	-11.5747	1.24483	-3.03123	1.25297	1126.95	-0.984132	1346.73
